# Supplementary material
Source: publisher site journal article supplement (https://www.spandidos-publications.com/2495/downloadSupplementary)

Figure S1. ANXA1 expression in SCLC cells transfected with lentiviral vectors. (A) RT-qPCR analysis of ANXA1 gene expression in SBC-5 cells transfected with lentiviral shRNA inhibitors or NC. (B) RT-qPCR analysis of ANXA1 gene expression in SBC-3 cells transfected with vector control or ANXA1 overexpression vector. Western blot analysis of ANXA1 protein expression in (C) SBC-5 and (D) SBC-3 cells transfected with ANXA1 lentiviral shRNA inhibitors or overexpression vector, respectively. \* $P < 0.05$  vs. parental or control cells. RT-qPCR, reverse transcription-quantitative PCR; SCLC, small cell lung cancer; ANXA1, annexin A1; NC, negative control; sh, short hairpin.

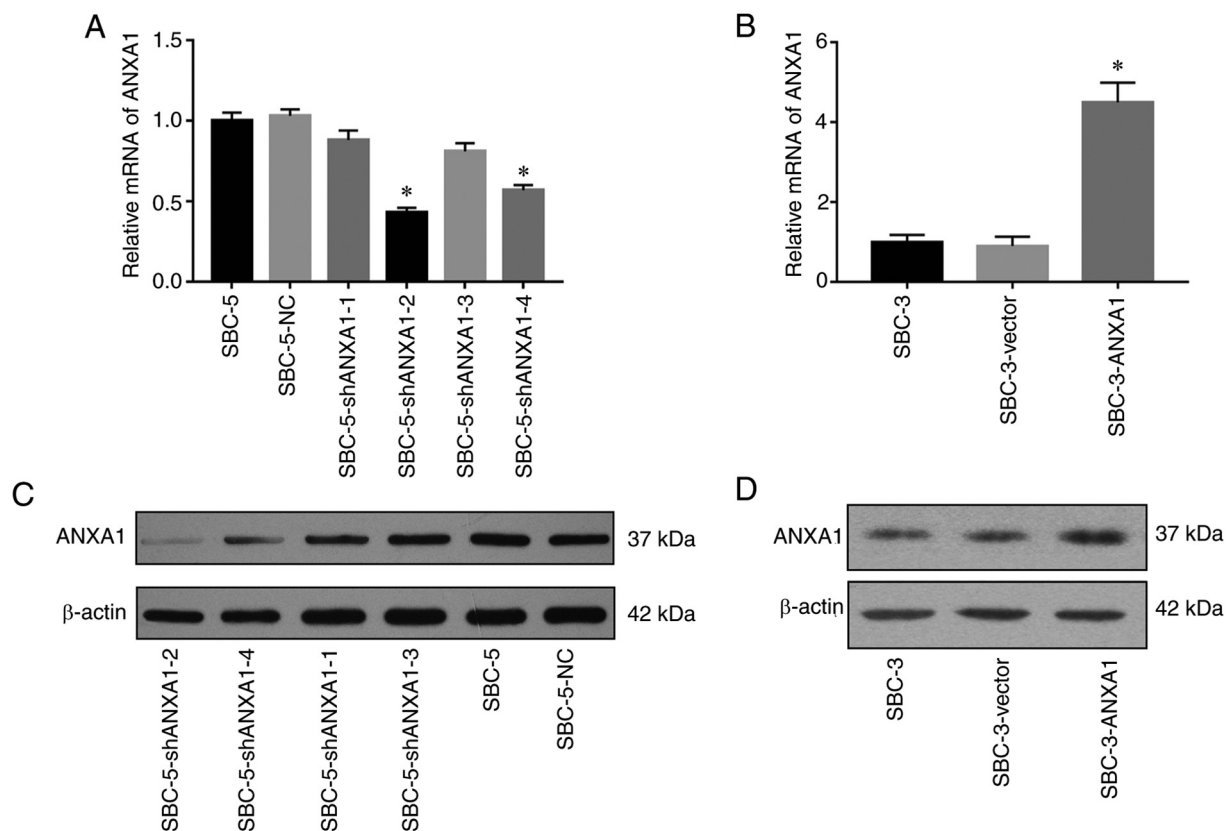

Figure S2. Effects of ANXA1 expression on invasion and migration of SCLC cells. Effects of ANXA1 expression on invasion and migration of (A) SBC-3 cells and (B) SBC-5 cells. Scale bar, 100  $\mu$ m. ANXA1, annexin A1; SCLC, small cell lung cancer.

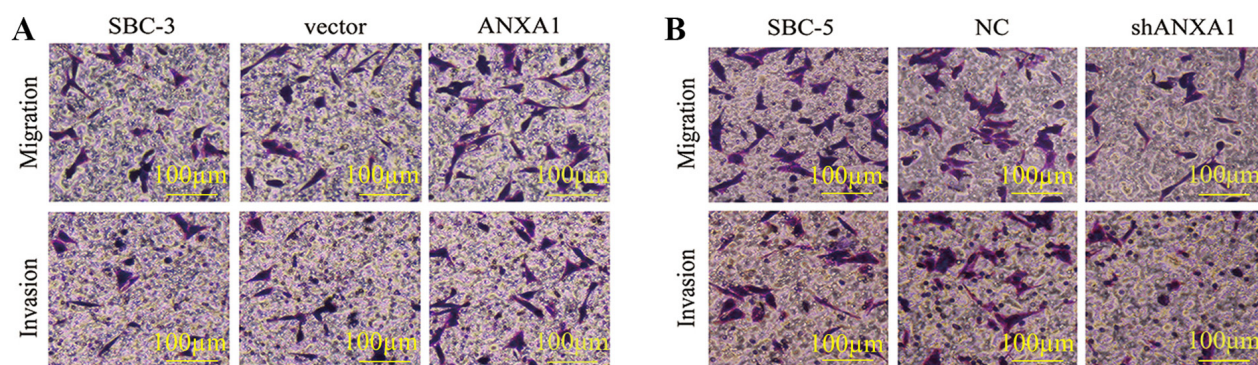

Supplement: Supplementary file 1 [file downloadSupplementary]
